Article in the Discoveries section

**Evolution of Gene Expression and Splicing in Parallel Cold-Adapted Fly Populations**

Yuheng Huang<sup>1\*@</sup>, Justin B. Lack<sup>1\*\*</sup>, Grant T. Hoppel<sup>1</sup>, and John E. Pool<sup>1@</sup>

<sup>1</sup>Laboratory of Genetics, University of Wisconsin-Madison, Madison, Wisconsin 53706

\* Current address: Department of Ecology and Evolutionary Biology, University of California, Irvine, Irvine, CA 92697

\*\* Current address: Advanced Biomedical Computational Science, Frederick National Laboratory for Cancer Research, Frederick, MD 21701

@e-mail: [yhenh3@uci.edu](mailto:yhenh3@uci.edu); [jpool@wisc.edu](mailto:jpool@wisc.edu).

## 17 **Abstract**

18 Changes in gene regulation at multiple levels may comprise an important share of the molecular  
19 changes underlying adaptive evolution in nature. However, few studies have assayed within- and  
20 between-population variation in gene regulatory traits at a transcriptomic scale, and therefore  
21 inferences about the characteristics of adaptive regulatory changes have been elusive. Here, we assess  
22 quantitative trait differentiation in gene expression levels and alternative splicing (intron usage)  
23 between three closely-related pairs of natural populations of *Drosophila melanogaster* from contrasting  
24 thermal environments that reflect three separate instances of cold tolerance evolution. The cold-  
25 adapted populations were known to show population genetic evidence for parallel evolution at the  
26 SNP level, and here we find significant although somewhat limited evidence for parallel expression  
27 evolution between them, and less evidence for parallel splicing evolution. We find that genes with  
28 mitochondrial functions are particularly enriched among candidates for adaptive expression  
29 evolution. We also develop a method to estimate cis- versus trans-encoded contributions to  
30 expression or splicing differences that does not rely on the presence of fixed differences between  
31 parental strains. Applying this method, we infer important roles of both cis- and trans-regulation  
32 among our putatively adaptive expression and splicing differences. The apparent contributions of cis-  
33 versus trans-regulation to adaptive evolution vary substantially among population pairs, with an  
34 Ethiopian pair showing pervasive trans-effects, suggesting that basic characteristics of regulatory  
35 evolution may depend on biological context. These findings expand our knowledge of adaptive gene  
36 regulatory evolution and our ability to make inferences about this important and widespread process.

37

## 38 **Introduction**

39 Different species or populations often evolve similar phenotypes when adapting to similar  
40 environments (Schluter 2000; Losos, 2011). Although such parallel phenotypic evolution can be  
41 caused by structural mutations changing amino acids (Hoekstra and Coyne, 2007), there is increasing  
42 evidence that regulatory mutations altering gene expression underlie many cases of phenotypic  
43 evolution (Wittkopp & Kalay, 2012; Jones et al. 2012; Stern 2013; Sackton et al. 2019). Most studies  
44 on gene expression focus on expression abundance (the number of transcripts for a whole gene).  
45 However, alternative splicing resulting in the difference of transcript proportions can also contribute  
46 to adaptation (Barbosa-Morais et al. 2012; Gamazon and Stranger 2014; Smith et al. 2018).  
47 Therefore, understanding the transcriptomic basis of parallel phenotypic evolution requires studies of  
48 both expression abundance and alternative splicing, although the latter aspect has rarely been  
49 studied.

50

51 The level of parallelism for gene expression abundance changes varies across study systems. In some  
52 taxa and natural conditions, significantly more genes show parallel changes (repeatedly up- or down-  
53 regulated in one ecotype relative to the other among independent population pairs) than anti-  
54 directional changes (Zhao et al. 2015; Hart et al. 2018; Kitano et al. 2018; McGirr and Martin,  
55 2018). However, some other cases did not show significant parallel patterns, or they even show anti-  
56 parallel patterns (Derome et al. 2006; Lai et al. 2008; Hanson et al. 2017). The varying degree of  
57 parallelism may partly be explained by the level of divergence among ancestors: more closely related  
58 ancestors are expected to show a higher degree of parallel genetic evolution underlie similar  
59 phenotypic evolution (Conte et al. 2012; Rosenblum et al. 2014).

60

61 Furthermore, gene expression evolution can be caused by the same or different molecular  
62 underpinnings. Because of the difficulties of mapping expression QTL, a first step is to classify the  
63 expression evolution into two regulatory classes. Cis-regulatory changes are caused by local  
64 regulatory mutations and result in allele-specific expression difference in a hybrid of divergent  
65 parental lines (Cowles et al. 2002; Wittkopp et al. 2004). Trans-regulatory changes are caused by  
66 regulatory mutations at other loci. They modify the expression of both alleles in hybrid diploids and  
67 do not result in allele-specific expression difference (Gilad et al. 2008). The relative importance of cis-  
68 and trans-effects to parallel evolution varies among different studies systems (Wittkopp et al. 2008;  
69 McManus et al. 2010; Wittkopp and Kalay 2012; Chen et al. 2015; Osada et al. 2017; Hart et al.  
70 2018; Nandamuri et al. 2018; Verta and Jones 2019). Most previous studies have focused on  
71 regulatory evolution between relatively distantly related lineages such as different species, from which  
72 population genetic evidence of adaptive evolution may not be available. Hence, the contributions of  
73 cis- and trans-effects to the recent adaptive divergence between populations remain mostly unknown.

74

75 In part because of the interest in the evolutionary response to climate change, *Drosophila* has been  
76 used as a model system to study the genetic basis of thermal adaptation (Hoffmann et al. 2003).  
77 Because temperature is an important environmental variable along latitudinal clines, clinal  
78 populations of *Drosophila melanogaster* have been studied for decades (Adrion et al. 2015). Along these  
79 clines, populations exhibit different degrees of cold tolerance in the expected direction, suggesting  
80 spatially varying selection related to temperature (Hoffmann and Weeks 2007; Schmidt and Paaby  
81 2008). The recent development of genomics has allowed identification of clinal genomic variants,  
82 which are candidates for thermal adaptation (e.g., Kolaczowski et al. 2011; Fabian et al. 2012;

83 Bozicevic et al. 2016; Mateo et al. 2018). There is also evidence of parallel evolution at the genomic  
84 and transcriptomic level (Reinhardt et al. 2014; Bergland et al. 2015; Machado et al. 2015; Zhao et  
85 al. 2015; Juneja et al. 2016; Zhao and Begun 2017). Some of these studies compared clines between  
86 species (which may have somewhat distinct biology), while others compared clines between Australia  
87 and North America (which both feature primarily European ancestry with clinally variable African  
88 admixture). Other transcriptomic studies have identified genes showing differential expression  
89 between sub-Saharan African and European populations (e.g., Catalan et al. 2012; Huylmans and  
90 Parsch 2014), which are separated by moderately strong neutral genetic differentiation associated  
91 with the out-of-Africa bottleneck.

92  
93 More broadly, populations of *Drosophila melanogaster* from contrasting environments offer an excellent  
94 opportunity to study parallel gene regulatory evolution and its underlying mechanisms. Originating  
95 from a warm sub-Saharan ancestral range (Lachaise et al. 1988; Pool et al. 2012), *D. melanogaster*  
96 has occupied diverse habitats, including environments with contrasting temperature ranges. There  
97 are at least three instances in which the species expanded to cold environments: from Africa into  
98 higher latitude regions in Eurasia, from Ethiopia lowland to higher altitudes, and from South Africa  
99 lowland to higher altitudes. Populations were collected from these six regions, representing three  
100 warm-cold population pairs: Mediterranean pair (Med), collected in Egypt (EG, warm) and France  
101 (FR, cold); Ethiopian pair (Eth) collected in Ethiopia lowland (EA, warm) and highland (EF, cold);  
102 and South Africa pair (SAf), collect in South Africa lowland (SP, warm) and highland (SD, cold).  
103 Importantly, each of these population pairs has the advantage of low genetic differentiation between  
104 its warm- and cold-adapted members (Pool et al. 2017). Although the cold populations have invaded  
105 colder habitats for only ~1000-2000 years (~15k-30k generations) (Sprengelmeyer et al. 2019), they  
106 have shown signals of parallel adaptation for cold tolerance and allele frequency changes (Pool et al.  
107 2017). In the present study, this unique system allows us to assess the degree of parallelism for  
108 transcriptomic changes underlying parallel cold tolerance evolution.

109  
110 Here, we generate RNA sequencing (RNA-seq) data for multiple outbred genotypes from each of the  
111 six population samples listed above, from larval, pupal, and adult stages. We estimate gene  
112 expression and alternative intron usage levels for each sample, then identify cases of unusually high  
113 quantitative trait differentiation between each pair of warm- and cold-adapted populations. We find  
114 evidence for parallel evolution for expression abundance at the larval and female adult stage, but less  
115 parallel signal for splicing. We further tease out the cis-vs. trans-regulatory effect by sequencing the

116 transcriptomics of the parental lines from different populations and their F1 offspring. Applying our  
117 resampling approach to study cis- and trans-regulatory effects, we find the relative contribution of cis-  
118 vs. trans-effects to adaptive expression differentiation varies notably across population pairs. Finally,  
119 we identify several candidate genes with both cis-effects and high  $F_{ST}$ , as potential targets of local  
120 adaptation.

121

122

## 123 **Results**

### 124 *Phenotypic evolution related to cold adaptation*

125 The cold populations have been shown to have a higher proportion of recovered female adults after  
126 prolonged cold exposure than the respective warm populations (Pool et al. 2017). Here for egg-to-  
127 adult survival at 15°C, we found the FR and EF populations have significantly higher survival than  
128 the ancestral range Zambia ZI population, while at 25°C benign temperature all the populations  
129 have relatively high survival (75%). Although SD is not significantly better than ZI at cold  
130 temperature for this assay, it follows the same trend. Together the results for survival and adult cold  
131 tolerance suggest the cold populations have evolved to adapt to low temperature.

132

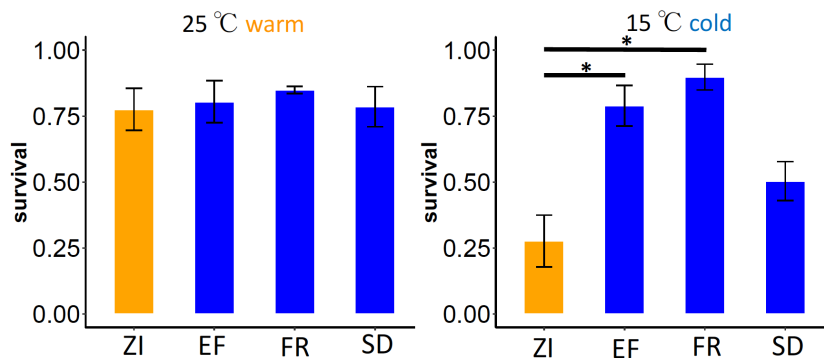

133

134 Fig 1. Survival for the ancestral warm population (ZI) and the cold populations (EF, FR and SD) at  
135 different temperatures. \* indicates the survival is significant difference ( $p < 0.05$ ). Error bar shows the  
136 standard error based on three strains.

137

### 138 *Co-directional evolution in gene expression between population pairs*

139 To focus on the transcriptomes of outbred genotypes, we generated eight within-population crosses  
140 from each population under a derived cold environment (15 °C). We then surveyed the  
141 transcriptomes on larvae, pupae and female adults for each cross using high-throughput RNA

142 sequencing (RNA-Seq). We used a quantitative genetic index,  $P_{ST}$ , to quantify phenotypic  
 143 differentiation of expression and splicing between populations in each pair.  $P_{ST}$ , analogous to  $F_{ST}$  for  
 144 genetic variation, measures the amount of trait variance between populations versus total variance for  
 145 a phenotype (Merila et al. 1997; Brommer 2011; Leinonen et al. 2013). The genes/introns with  
 146 highest  $P_{ST}$  quantiles are more likely to be under ecological differential selection between populations  
 147 than those with lower  $P_{ST}$  quantiles (Leder et al. 2015).

148

149 The numbers of genes that passed the filters for analysis were (same across population pairs): 4699  
 150 genes for larva, 5098 genes for pupa and 6786 genes for adult. To study gene expression divergence  
 151 potentially under ecologically differential selection, we calculated  $P_{ST}$  (Materials and Methods). The  
 152 top 20  $P_{ST}$  outliers for each population/stage for expression and for splicing are listed in Table S1.

153

154 We used the upper 5% of  $P_{ST}$  quantile as outliers for each population pair. We found signals of  
 155 parallel expression divergence in all three pairwise comparisons (Med vs. Eth; Med vs. SAf; Eth vs.  
 156 SAf), where the shared outliers with co-directional changes were more than expected by chance.

157 Across the three developmental stages, adult stage showed the highest level of parallelism (on average  
 158 0.34% of outliers were shared and changed consistently).

159

| stage            | larva      |     | pupa       |      | adult      |            |
|------------------|------------|-----|------------|------|------------|------------|
| Population pairs | Med        | SAf | Med        | SAf  | Med        | SAf        |
| Eth              | 1.4        | 1.2 | <b>2.2</b> | 0.79 | 1.4        | <b>4.3</b> |
| SAf              | <b>3.1</b> |     | 0.16       |      | <b>2.4</b> |            |

160 Table 1. The proportional enrichment of parallel expression abundance changes in real data relative  
 161 to expectation. The proportion of parallelism expected by chance is  $0.05 \times 0.05 \times 0.5 = 0.00125$ . All the  
 162 proportions for larvae and adult stages were higher than the expectation (proportional enrichment >  
 163 1). Those that were significantly greater than the expectation are in bold (binomial one-tailed test,  
 164 Bonferroni correction for nine tests in total).

165

166 To explore the broader patterns of parallel changes, we used the upper 5%  $P_{ST}$  outliers in a  
 167 population pair (*Outlier Pair*) and examined whether the expression for this set of genes changed in the  
 168 same direction in another pair (*Directional Pair*), regardless of outlier status in the latter pair. There

169 were excesses of co-directional changes in the *Directional Pairs* for the larval stage (Figure 1). However,  
 170 the patterns were weaker for the adult stage and there were excesses of anti-directional changes for  
 171 the pupal stage.  
 172

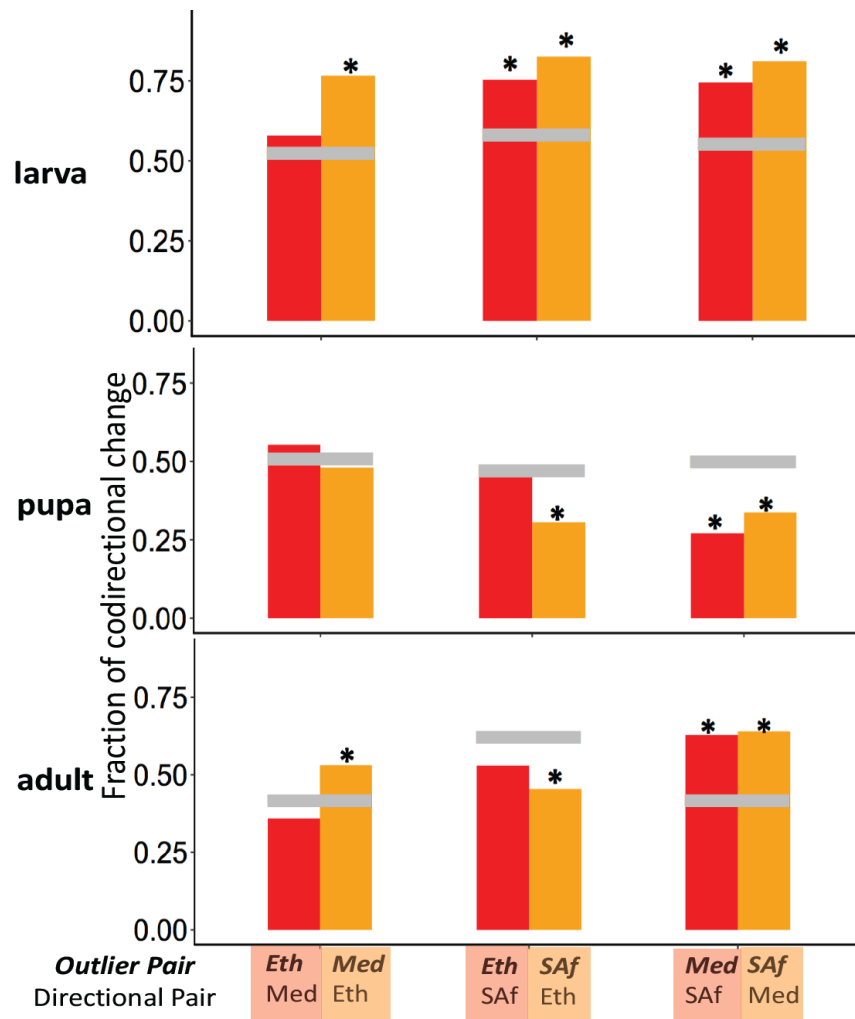

173  
 174 Fig. 2. Fractions of co-directional gene expression changes in *Directional Pairs* for the  $P_{ST}$  outliers  
 175 identified at the *Outlier Pairs*. The grey bar indicates the fraction of co-directional change for the  
 176 control set of genes. \* indicates the fraction for the outliers is significantly different from the control  
 177 genes after Bonferroni correction. Overall, the Med and SAf pairs showed stronger co-directional  
 178 changes than the comparisons involved Eth pair.

179  
 180 We also performed a similar analysis for  $P_{ST}$  outliers of alternative exon junction usage. The numbers  
 181 of exon junctions that passed the cutoffs for  $P_{ST}$  calculation were 976 for larva, 4604 for pupa and  
 182 7059 for adult. The patterns of co-directional changes were qualitatively similar to those for gene

183 expression (Fig. S1). The fractions of co-directional changes were still highest for the larvae among  
184 the three stages; all of the comparisons except one showed an excess of co-directional changes relative  
185 to the control comparisons. For pupae, there was evidence for both co-directional and anti-  
186 directional changes. For female adult stages, the major pattern was an excess of anti-directional  
187 changes.

188

#### 189 *Enriched functional categories for the $P_{ST}$ outliers for gene expression and exon usage*

190 Significant Gene Ontology (GO) terms enriched in different sets of  $P_{ST}$  outliers for gene expression  
191 are listed in Table S2. Among the significant GO terms for different population pairs, we found six  
192 terms shared between Med pair and Eth pair at the adult stage. The level of sharing is significantly  
193 more than we expect by chance based on permuted outlier sets ( $p < 0.001$ ), suggesting functional  
194 convergence for adult development to the cold environment for Med pair and Eth pair. Further,  
195 similar GO terms were identified from different pairs at different stages such as terms related to  
196 mitochondria, nucleoside metabolic process, and oxidoreductase complex. However, the majority of  
197 GO terms were unique for different pairs, suggesting that many functional changes for adaptation to  
198 cold environments may be population-specific.

199

#### 200 *Cis- and trans-acting contributions to differential gene expression abundance*

201 One major goal is to distinguish the contributions of cis- and trans-regulatory effects on expression  
202 differentiation. First, we compared the overall strengths of cis- and trans-effects by estimating the  
203 absolute values of cis- and trans-effects for all analyzed genes. The magnitudes of trans-effects are  
204 significantly larger than the cis-effects in all three population pairs (mean absolute cis effects and trans  
205 effects are: Med pair, 0.09 vs. 0.14,  $p < 2.2e-16$ ; Eth pair, 0.27 vs. 0.32,  $p = 1.5e-14$ ; SAf pair, 0.14 vs.  
206 0.15,  $p < 2.2e-16$ . ‘Mann-Whitney’ paired test.). Moreover, we found strong negative relationships  
207 between cis- and trans-effects within each population pair (Fig. S2), where the cis- and trans-effects  
208 are generally in the opposite directions.

209

210 Next, we used our conservative permutation approach (see Materials and Methods) to study how  
211 many genes show a significant cis-effect, trans-effect or both. Averaged across population pairs, we  
212 found that for the expression abundance, 12.6% show cis only regulatory effects while 26.2% show  
213 trans only effects, consistent with trans-effects being stronger on average than cis-effects (Table 2).  
214 Because we are interested in the regulatory contributions to adaptive evolution of gene expression, we  
215 further compared the ratio of trans only to cis only genes between  $P_{ST}$  outliers and non-outliers. The



216 ratio is significantly lower in  $P_{ST}$  outliers than that in non-outliers for Med pair ( $p = 0.003$ ) but the  
217 pattern reverses for Eth pair ( $p = 8.5e-10$ ; Fig. 3 left; Fig. 4). While the ratio is not different for SAF  
218 pair ( $p = 0.999$ ). Hence, there is not a consistent pattern of greater usage of cis- versus trans-  
219 regulatory changes in putatively adaptive expression changes compared with transcriptome-wide  
220 differentiation.

221  
222 On average across population pairs, about 31% of all genes in the analysis showed both effects (Table  
223 2). Among the outlier genes showing both effects (Fig 4), the vast majority (85%) of them were in  
224 opposite directions (*i.e.* compensatory). Similarly, most of the control genes with both effects showed  
225 apparent compensation (88%), which is consistent with the transcriptome-wide negative relationship  
226 between cis- and trans-effects (Fig. S2). Although the pattern can be biologically meaningful, it may  
227 also represent an artifact from using the same F1 expression data for allele specific expression (ASE)  
228 estimation to infer both cis- and trans-effects. Any measurement error on ASE will introduce  
229 artifactual negative correlation between cis- and trans-acting changes (see Discussion below).  
230

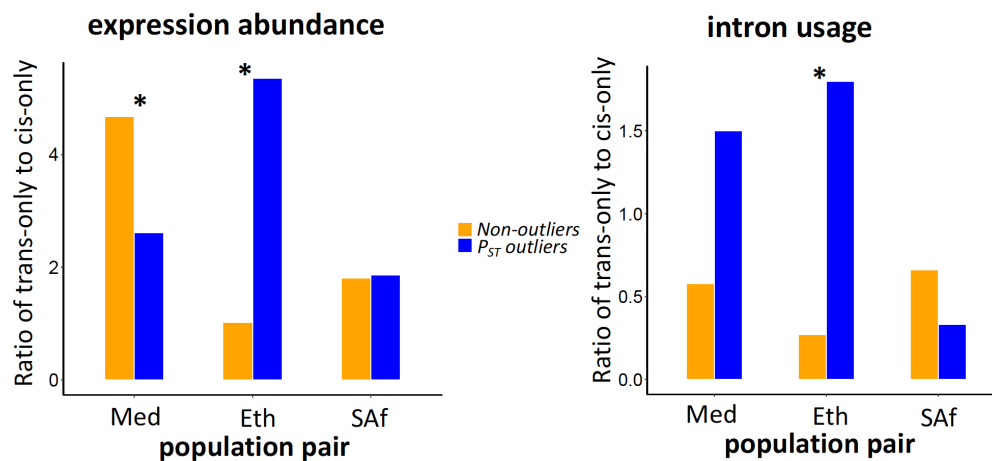

231  
232 Fig 3. Ratio of genes (left) and intron usage (right) showing trans only regulatory effects to those  
233 showing cis only effects for  $P_{ST}$  outliers and non-outliers. \* indicates the ratio is significantly different  
234 between  $P_{ST}$  outliers and non-outliers ( $p < 0.005$ ).

235

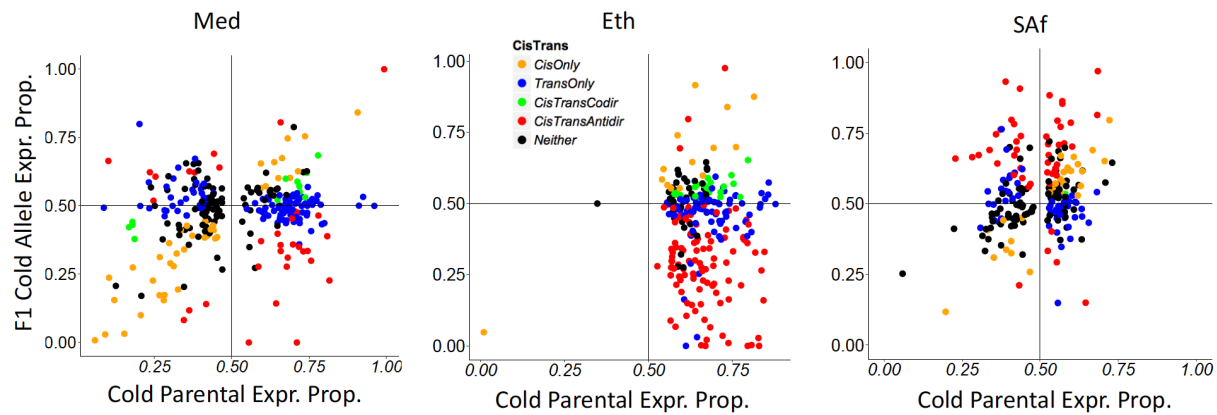

236

237 Fig 4. The relative expression proportion of cold alleles in parental and F1 datasets. The colors of the  
238 points indicate the regulatory mechanism of the outlier genes inferred by our approach.

239

240 Since the cis-regulatory mutations contributing to local adaptation may show differentiation in allele  
241 frequency between populations, we examined whether genes with cis-effects (including cis only genes  
242 and genes with both cis- and trans-effects) show association with high  $F_{ST}$  between the two warm and  
243 cold populations – for both window  $F_{ST}$  ( $F_{ST\_winmax}$ ) and SNP  $F_{ST}$  ( $F_{ST\_SNPmax}$ ). We found that only genes  
244 with high  $F_{ST\_winmax}$  are enriched in cis-regulated genes in Med pair (the proportion for high  $F_{ST\_winmax}$   
245 is: cis-effect genes, 22.5%; control non-outliers, 11%;  $p = 0.037$ ). However, there was no significant  
246 enrichment for high  $F_{ST\_SNPmax}$  in cis-regulated genes. Moreover, there was no enrichment for either  
247 window or  $F_{ST\_SNPmax}$  with cis-regulated genes in the other population pairs.

248

249 We then focused more narrowly on a set of outlier genes that showed both significant cis-effect only  
250 and higher  $F_{ST}$  quantile (upper 5%), which could reflect adaptive regulatory evolution targeting the  
251 surveyed sequences or nearby sites. For Med pair, there were three cis-genes showing high window  
252  $F_{ST}$  (*Ciao1*, *Cyp6a17*, and *NiPp1*) and one cis-gene showing high  $F_{ST\_SNPmax}$  (*spin*). Interestingly, *Cyp6a17*  
253 encodes a cytochrome P450 protein that is required for temperature preference behavior (Kang et al.  
254 2011). *Cyp6a17* variants have also been associated with insecticide resistance (Battlay et al. 2018;  
255 Duneau et al. 2018). *Cyp6a17* is impacted by a polymorphic whole-gene deletion with contrasting  
256 frequencies between populations (Chakraborty et al. 2018), underscoring its likely role in local  
257 adaptation. The *spin* gene is essential for mTOR reactivation and lysosome reformation after  
258 starvation and has important effects on nervous system and courtship behavior (Nakano et al. 2001;  
259 Rong et al. 2011). For Eth pair, there were two genes with high window  $F_{ST}$  (*CG3529* and *mle*) and  
260 one with high  $F_{ST\_SNPmax}$  (*Aldh-III*), which encodes a protein that confers a xenobiotic stress resistance  
261 and neutralises the lipid aldehydes formed after the attack of reactive oxygen and radicals (Arthaud et

262 al. 2011; Mateo et al. 2014). For SAf pair, one cis-gene showed both high window  $F_{ST}$  and high  
263  $F_{ST\_SNPmax}$  (*AGO2*) and one showing high  $F_{ST\_SNPmax}$  (*eca*). *AGO2* is involved with antiviral defense and  
264 developmental regulation (Deshpande et al. 2005; Nayak et al. 2010) and was previously found to  
265 contain fixed differences between European and African populations (Pool 2015). For the genes  
266 showing high  $F_{ST\_SNPmax}$  (*spin*, *Aldh-III*, *AGO2*, and *eca*), we plotted the SNP  $F_{ST}$  along the gene region  
267 to show the sites that are the most likely targets of selection (Fig. 5). Interestingly, for *spin*, *Aldh-III* and  
268 *eca*, the highest  $F_{ST}$  sites are located in noncoding regions (intron region for *spin*, downstream of the  
269 gene for *Aldh-III* and upstream of the gene for *eca*). While for *AGO2*, the highest  $F_{ST}$  site was located in  
270 the protein coding sequence.

271  
272 Further, we identified seven genes showing consistent cis-effects across two population pairs (cis-effect  
273 favored expression of the same cold or warm parental alleles). Similarly, these shared cis- effect genes  
274 might show high genetic differentiation specific for cold populations in the two focal pairs. Using the  
275 “Population Branch Excess” statistic (PBE) results from Pool et al. 2017, we found that one gene  
276 named *Tollo* contained SNPs showing high cold-population specific differentiation (PBE quantile <  
277 0.05) in both Eth and SAf pairs. *Tollo* is known to be have several important functions: innate  
278 immune response, glucose and protein metabolism regulation, and peripheral nervous system  
279 development (Seppo et al. 2003; Yagi et al. 2010; Akhouayri et al. 2011; Ballard et al. 2014).

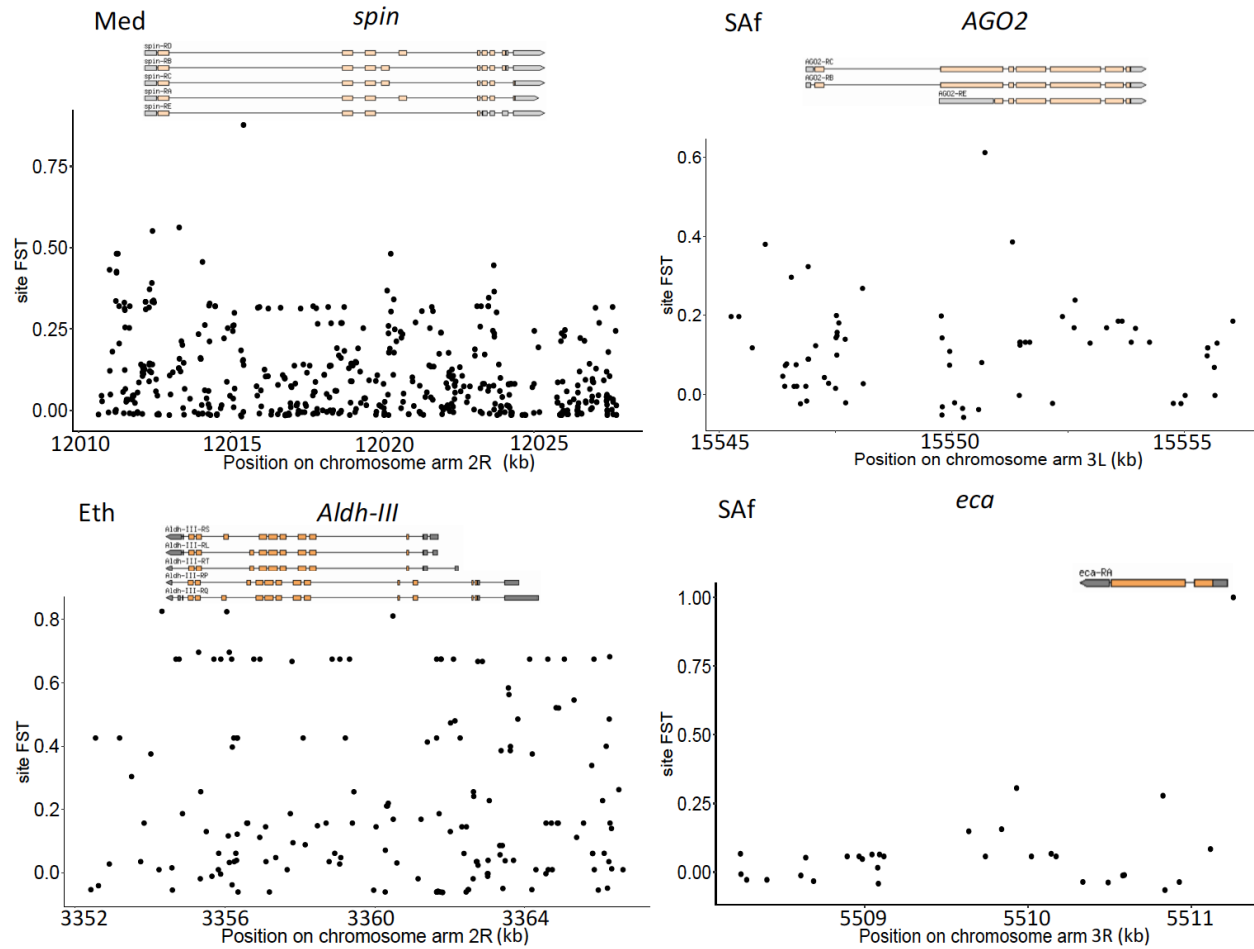

280

281 Fig 5. SNP  $F_{ST}$  along the gene with flanking region of 2kb for *spin* in Med pair, *Aldh-III* in Eth pair  
 282 and *AGO2* and *eca* in SAf pair. The top diagram depicts the coding (orange) and non-coding (gray)  
 283 exon, captured from GBrowse 2 of *D. melanogaster* (R5.57) from FlyBase (St. Pierre et al. 2014).

284

| pair | expression type   | Total tests | Cis only  | Trans only | Both co-dir | Both anti-dir | Neither    |
|------|-------------------|-------------|-----------|------------|-------------|---------------|------------|
| Med  | $P_{ST}$ outliers | 282         | 41 (15%)  | 107 (38%)  | 12 (4%)     | 34 (12%)      | 88 (31%)   |
|      | Non-outliers      | 4887        | 431 (9%)  | 2015 (41%) | 288 (6%)    | 917 (19%)     | 1236 (25%) |
| Eth  | $P_{ST}$ outliers | 251         | 14 (6%)   | 75 (30%)   | 20 (8%)     | 104 (41%)     | 38 (15%)   |
|      | Non-outliers      | 4851        | 967 (20%) | 985 (20%)  | 147 (3%)    | 1905 (39%)    | 847 (17%)  |
| SAf  | $P_{ST}$ outliers | 224         | 29 (13%)  | 54 (24%)   | 1 (0.4%)    | 49 (22%)      | 91 (41%)   |

|  |              |      |          |           |         |            |            |
|--|--------------|------|----------|-----------|---------|------------|------------|
|  | Non-outliers | 4721 | 431 (9%) | 780 (17%) | 60 (1%) | 1289 (27%) | 2161 (46%) |
|--|--------------|------|----------|-----------|---------|------------|------------|

285 Table 2. Numbers of gene expression abundance traits showing different regulatory effects for  $P_{ST}$   
 286 outliers and non-outliers. The percentage in parentheses indicates the fraction of genes in each  
 287 category relative to total genes in the tests.  
 288

| pair | Intron type       | Total tests | Cis only  | Trans only | Both co-dir | Both anti-dir | Neither   |
|------|-------------------|-------------|-----------|------------|-------------|---------------|-----------|
| Med  | $P_{ST}$ outliers | 21          | 2 (10%)   | 3 (14%)    | 0           | 3 (14%)       | 13 (62%)  |
|      | Non-outliers      | 375         | 78 (21%)  | 45 (12%)   | 2 (1%)      | 81 (22%)      | 169 (45%) |
| Eth  | $P_{ST}$ outliers | 37          | 5 (14%)   | 9 (24%)    | 1 (3%)      | 10 (27%)      | 12 (32%)  |
|      | Non-outliers      | 456         | 170 (37%) | 46 (10%)   | 5 (1%)      | 115 (25%)     | 120 (26%) |
| SAf  | $P_{ST}$ outliers | 18          | 3 (17%)   | 1 (6%)     | 0           | 10 (56%)      | 4 (22%)   |
|      | Non-outliers      | 460         | 62 (13%)  | 41 (9%)    | 1 (0.2%)    | 168 (37%)     | 188 (41%) |

289 Table 3. Numbers of introns showing different regulatory effects for  $P_{ST}$  outliers and non-outliers.  
 290 The percentage in parentheses indicates the fraction of introns in each category relative to the total  
 291 introns in the tests.

292  
 293 *Cis- and trans-acting contributions to differential intron usage*

294 For all intron usage, we found the magnitude of trans-effects on average to be higher than that of cis-  
 295 effects (mean absolute cis effects and trans effects are: Med pair, 0.15 vs. 0.18,  $p = 6.2e-06$ ; Eth pair,  
 296 0.32 vs. 0.34,  $p < 3.3e-5$ ; SAf pair, 0.20 vs. 0.22,  $p = 0.00027$ . ‘Mann-Whitney’ paired test.).

297 Although there are few outlier introns tested for cis- and trans-regulatory effects (Table 3) because of  
 298 the limited diagnostic SNPs located within the intron regions, we found the numbers of significant  
 299 trans only introns were higher than that of significant cis only introns summing across three  
 300 population pairs. While for non-outlier introns, the significant trans only introns are fewer than the  
 301 significant cis only introns (the numbers of cis only vs. trans only introns are ten vs. 13 for outliers;  
 302 311 vs. 132 for non-outliers;  $X^2 = 6.1$ ;  $df = 1$ ;  $P = 0.014$ ). Thus, trans-regulated splicing changes  
 303 appear to be relatively more common for putatively adaptive than for putatively neutral population  
 304 differences, although the pattern varies geographically (Figure 3).

305

306 For the outlier introns showing cis-effects (including only cis and both cis and trans), the maximum  
307  $F_{ST}$  ( $F_{ST\_SNPmax}$ ) around their splice sites tends to be higher than that for non-outliers (average  $F_{ST\_SNPmax}$   
308 for cis outlier vs. non-outliers: Med: 0.184 vs. 0.153; Eth: 0.152 vs. 0.134; SAf: 0.081 vs. 0.055).  
309 Because there are few cis outlier introns with SNPs located around splice sites, all three comparisons  
310 are non-significant based on Wilcoxon signed-rank test. Across the three comparisons, four genes  
311 contained cis-regulated introns with high  $F_{ST\_SNPmax}$  around splice sites (top 15% quantile of  $F_{ST\_SNPmax}$ ).  
312 One identified in Med pair is *Usp10*, which is known to regulate Notch Signaling during development  
313 (Zhang et al. 2012). One gene identified in SAf pair is *Sdc*, which has been shown to have  
314 neuromuscular functions (Johnson et al. 2006; Chanana et al. 2009). The other two genes (*DOR* and  
315 *Jabba*) were related to lipid metabolism (Francis 2010; McMillan et al. 2018). Since the two lipid  
316 related genes were identified in highland pairs (*DOR* in SAf and *Jabba* in Eth), putative changes in  
317 lipid metabolism might facilitate adaptation to high altitude environments.

318

## 319 **Discussion**

320 Parallel evolution has often been studied at the population genetic and trait levels, but it has less  
321 frequently been analyzed at the transcriptome level (Stern 2013; Juneja et al. 2016). In this study, we  
322 used three recent instances of adaptation to colder climates in *Drosophila melanogaster* to study the  
323 evolution of gene expression and alternative splicing. The signal of parallel evolution in expression  
324 abundance varied among developmental stages, with a higher degree of parallelism for larva and  
325 adult stages than pupa. Further, we studied cis- and trans-regulatory evolution in the context of this  
326 ecological adaptation. For gene expression abundance, we found geographically variable patterns of  
327 cis- versus trans-effects for highly differentiated expression outliers relative to the other genes.  
328 Specifically,  $P_{ST}$  outliers show enrichment of cis-effect relative to background genes in Med pair while  
329 outliers show enrichment of trans-effect in Eth pair. For splicing, we also found  $P_{ST}$  outliers enriched  
330 for trans-effects in Eth pair. This pattern of trans-effects contributing to differential expression in the  
331 Ethiopian pair raises the possibility of large-scale gene regulatory network changes in this  
332 phenotypically distinctive highland population, which might result from a few genetic changes or  
333 from many.

334

335 Although there are significant patterns of parallel evolution in expression abundance between  
336 population pairs, the majority of outlier genes/intron usages are not shared between pairs. The low  
337 level of detected parallelism could reflect a high false negative rate, for example due to limited  
338 spatiotemporal expression of relevant differences (perhaps contributing to the greater parallelism

339 detected in larvae, which have somewhat less tissue diversity). Alternatively, it might reflect the  
340 different selection agents in the different natural habitats as well as the demographic histories for  
341 these populations. The cold FR population colonized a higher latitude environment than the related  
342 warm population EG, whereas the other two cold populations colonized higher altitude environments  
343 where the selection agents may include air pressure, desiccation and ultraviolet radiation (Pool et al.  
344 2017). Also, the Med pair has experienced the trans-Saharan bottleneck (Pool et al. 2012;  
345 Sprengelmeyer et al. 2019) and the standing genetic variation may be altered, potentially resulting in  
346 a distinct evolutionary path for FR compared to other two cold populations. Although EF and SD  
347 have both adapted to higher altitudes (EF at 3,070 meters above sea level, SD at 2,000), SD is  
348 seasonally cold (like FR) whereas EF is perpetually cool. Notably, the EF population exhibits distinct  
349 phenotypic evolution such as darker pigmentation (Bastide et al. 2014), larger body size (Pitchers et  
350 al. 2013; Lack et al. 2016), and reduced reproductive rate (Lack et al. 2016). Therefore, the  
351 underlying transcriptomic evolution for EF may partly reflect its unique phenotypic evolution.  
352 Indeed, the Eth pair shows the least parallelism at gene level with the other pairs (Table 1; Fig. 2),  
353 although it shared some parallel functional categories with the Med pair (Table S1).

354  
355 Compared to the expression abundance, the pattern of parallelism is much weaker for intron usage  
356 (Fig. 2, Fig S1), which may partly stem from lower power to detect intron usage change (only a small  
357 proportion of reads are informative for exon junctions). However, we still found the Med pair and  
358 SAf pair show more parallel changes than the combinations with the Eth pair, which is consistent  
359 with results for expression abundance. Given the increasing evidence for alternative splicing  
360 contributing to environmental response and adaptation (e.g., Singh et al. 2017; Signor and Nuzhdin  
361 2018; Smith et al. 2018), we need to study both expression abundance and splicing to fully  
362 understand the evolution at the transcriptome level. The development of sequencing approaches with  
363 long reads that cover the entire transcripts will enable us to quantify isoforms frequency directly and  
364 broaden the scope of alternative splicing variation that can readily be quantified. Since splicing  
365 changes during development and among tissues (Brown et al. 2014; Gibilisco et al. 2016), a detailed  
366 sampling throughout development of different tissues will also be necessary to understand the role of  
367 splicing on ecological adaptation.

368  
369 We found trans-effects are generally larger than the cis-effects across the transcriptome, which is  
370 consistent with some previous studies (e.g., McManus et al. 2010; Coolon et al. 2014; Albert et al.  
371 2018; Hart et al. 2018) but not with others (e.g., Lemmon et al. 2014; Mack et al. 2016; Verta and

372 Jones 2018). The transcriptome-wide stronger trans-effects can be caused by random regulatory  
373 changes biased toward trans-regulation because of the larger trans-mutational target size (Landry et  
374 al. 2007). To focus on the evolved changes related to adaptation, we compared the ratios of genes  
375 with trans-effects to those with cis-effects between  $P_{ST}$  outliers and non-outliers and saw patterns  
376 varied among population pairs (Fig. 3). Cis only genes are enriched in the outliers of Med pair while  
377 trans only genes are enriched in the outliers of Eth pair, suggesting different adaptive regulatory  
378 mechanisms responding to ecological shifts. These results suggest that both cis- and trans-acting  
379 expression changes may be viable mechanisms of adaptive evolution. For intron usage, we found  
380 more differences showing cis-effects than trans-effects across the transcriptome (Table 3), consistent  
381 with splicing differences between *Drosophila* species studied by McManus et al. 2014. These results  
382 may be unsurprising since alternative splicing in *Drosophila* is mostly regulated by nearby sequences  
383 (Venables et al. 2011; Kurmangaliyev et al. 2015). However, particularly for the Ethiopian pair, we  
384 observed a relative excess of trans-regulation among  $P_{ST}$  outliers, which is consistent with expression  
385 abundance results for this same population pair (Fig. 3). Therefore, the genetic basis of gene  
386 regulatory evolution may depend on the mechanism (e.g. transcription vs. splicing), the evolutionary  
387 scale, and population-specific evolutionary events.

388  
389 When we considered genes/introns showing both cis- and trans- effects, we observed that the two  
390 types of effects were generally in opposite directions (anti-directional. Table 3). This is consistent with  
391 the idea that gene expression is under stabilizing selection in general and gene regulatory networks  
392 evolve negative feedback to buffer effects of regulatory changes (Denby et al. 2012; Coolon et al.  
393 2014; Bader et al. 2015; Fear et al. 2016). With regard to our  $P_{ST}$  outliers, it is possible that cis-acting  
394 changes might have evolved to compensate for unfavorable pleiotropic impacts of adaptive trans-  
395 regulatory evolution. However, negative correlations between cis- and trans-effects can also be an  
396 artifact coming from the measurement error on F1 expression data. Because the F1 data was used to  
397 estimate ASE and compared it to 0.5 (cis-effect null) and to parental expression proportion (trans-  
398 effect null), measurement error will introduce artifactual negative correlation between cis- and trans-  
399 acting changes. Therefore, whether the opposing effects between cis- and trans-acting changes are  
400 biologically meaningful will require further study. As Fraser (2019) and Zhang and Emerson (2019)  
401 proposed, using independent F1 replicates or other approaches such as eQTL mapping to infer cis-  
402 and trans-effects separately is necessary to affirm evidence of compensatory evolution.

403



404 We expect that the adaptive expression divergence caused by cis-regulatory changes should leave a  
405 signal in the nearby genomic region. Therefore, we used  $F_{ST}$  statistics to quantify genetic  
406 differentiation for the region around the focal genes. Window  $F_{ST}$  is sensitive to classic hard sweeps,  
407 and relatively useful for incomplete sweeps and moderately soft sweeps, but it is less useful for soft  
408 sweeps with higher initial frequencies of the beneficial allele (Lange and Pool 2016), for which SNP  
409  $F_{ST}$  may be more sensitive. Here, we only found enrichment of window  $F_{ST}$  outliers in cis-effect genes  
410 for the Med pair. Interestingly, a previous genomic study on these populations found a stronger signal  
411 of parallel change for SNP  $F_{ST}$  than for window  $F_{ST}$  genome-wide (Pool et al. 2017). In light of the  
412 lack of elevated SNP  $F_{ST}$  among our cis-regulatory  $P_{ST}$  outliers, the previously-observed population  
413 genetic parallelism may primarily reflect changes other than the cis-regulatory events identified from  
414 our whole-organism RNAseq data.

415

## 416 **Methods and Materials**

### 417 *Ecologically and phenotypically differentiated populations*

418 The three *Drosophila melanogaster* cold-warm population pairs used in this study, France-Egypt (Med),  
419 Ethiopia (Eth) and South Africa (SAf), were described in previous publications (Pool et al. 2012; Lack  
420 et al. 2015; Pool 2017). The three cold derived populations have evolved increased cold tolerance in  
421 parallel. A previous study has shown that female adults from the cold populations were more likely to  
422 recover after 96 hours at 4 °C than the respective warm populations (Pool et al. 2017). Here to  
423 confirm increased cold tolerance for the cold populations for egg-to-adult survival, we selected three  
424 strains from each of the FR, EF and SD populations as well as from the ancestral warm population  
425 ZI as control.

426

427 Developmental success was assayed at 15 °C as the cold environment and 25 °C as the warm control  
428 environment. 40 mated female flies were allowed to lay eggs in a half pint glass milk bottle with a  
429 standard medium at room temperature for 15 hours. Each strain had ~8 bottles. After the flies were  
430 removed and the number of eggs were counted, about half of the bottles were incubated at warm  
431 environment and the other half were incubated at cold environment. The numbers of adult flies  
432 emerged from each bottle were counted after 14 days and 42 days from warm and cold environments  
433 respectively. Bottles with more adults than recorded eggs were scored as 100% survival.

434 Developmental success for each strain was measured as the average emergence proportion among  
435 bottles, which is the number of emerged adults divided by the number of eggs. To determine

436 significance, unpaired t-tests between each cold population and the ZI population were performed for  
437 both temperature conditions.

438

#### 439 *RNA sample collections and sequencing*

440 Within each population of the three warm-cold pairs (six populations in total), we selected 16 strains  
441 and assigned them into eight crosses. Before the crossing, all the strains had been inbred for eight  
442 generations. The criterion for choosing parental strains for a cross was based on minimal genomic  
443 regions of overlapping heterozygosity. Among the strains chosen within each population, we used  
444 similar criteria to select four strains to perform crosses between the warm and the respective cold  
445 populations. Two of the four strains were used as the maternal lines and the other two were used as  
446 paternal lines in the between-population crosses. One cross between SD and SP populations was lost.  
447 We also collected adult female samples from the parental inbred lines used in the crosses.

448

449 All the flies were reared at 15°C, which approximated the derived cold condition. 20 virgin females  
450 and 20 males were collected from maternal and paternal lines respectively for each cross and allowed  
451 to mate and lay eggs for a week in half pint bottles. Each bottle contained standard *Drosophila* medium  
452 (containing molasses, cornmeal, yeast, agar, and antimicrobial agents). For the within-population  
453 crosses, samples at three developmental stages were collected: larva, pupa and female adult. Third-  
454 instar larvae were collected on the surface of the medium. For pupa, new yellow pupae were collected  
455 within one day of pupation. For adult, female flies were collected 4-5 days after eclosion. For samples  
456 from between-population crosses and parental lines, only female adults were collected. All the  
457 samples were shock-frozen in liquid nitrogen immediately after collection.

458

459 Approximate 50 larvae or 50 pupae or 30 female adults were used for RNA extraction for each  
460 sample. Total mRNA was extracted using the Magnetic mRNA Isolation Kit (New England Biolabs,  
461 Ipswich, MA) and RNeasy MinElute Cleanup Kit (Qiagen, Hilden, Germany). Strand-specific  
462 libraries were prepared using the NEBNext mRNA Library Prep Reagent Set for Illumina. Libraries  
463 were sized selected for approximately 150 bp inserts using AMPureXP beads (Beckman Coulter, CA,  
464 USA). The libraries were quantified using Bioanalyzer and manually multiplexed for sequencing. All  
465 libraries were sequenced on a HiSeq2500 (V4) with 2×75bp paired-end in two flow cells.

466

#### 467 *Quantifying gene expression and exon usage frequency*

468 The paired-end sequence reads for the within-population cross samples were mapped to the  
469 transcribed regions annotated in *D. melanogaster* (release 6, BDGP6.84) using STAR with parameters  
470 from ENCODE3's STAR-RSEM pipeline (Li and Dewey 2011; Dobin et al. 2013). For gene  
471 expression, the numbers of reads mapped to each gene were quantified using RSEM (Li and Dewey  
472 2011). Reads mapped to the rRNA were excluded in the analysis. The expression abundance for  
473 each gene was standardized by the numbers of reads mapped to the total transcriptome of the  
474 sample.

475  
476 To quantify exon usage, we used Leafcutter (Li et al. 2018) to estimate the excision frequencies of  
477 alternative introns. This phenotype summarizes different major splicing events, including skipped  
478 exons, 5' and 3' alternative splice-site usage, intron retention. Leafcutter took the alignment files  
479 generated by STAR as input to quantify the usage of each intron. Then Leafcutter formed clusters  
480 that contain all overlapping introns that shared a donor or accept splice site. The default parameters  
481 were used:  $\geq 50$  reads supporting each intron cluster and  $\leq 500$ kb for introns length. The exon usage  
482 frequency is the number of intron excision events divided by the total events per cluster. It is worth  
483 noting that Leafcutter only detects exon-exon junction usage and it is unable to quantify 5' and 3'  
484 end usage and intron retention (Alasoo et al. 2018), which were not examined here.

485  
486 *Identifying outliers in gene expression and intron usage differentiation*

487 To identify candidate genes under differential evolution between the warm and cold populations in  
488 each pair, we first controlled for the potential transcriptome skew caused by very highly expressed  
489 genes. For each expressed gene, we calculated the average expression of the cold samples ( $AvgExp_{cold}$ )  
490 and that of the warm samples ( $AvgExp_{warm}$ ). Then we obtained the median of the ratio of  
491  $AvgExp_{cold}/AvgExp_{warm}$  across all expressed genes for the population pair. Gene expression for the warm  
492 samples was normalized by multiplying this median before subsequent analysis. This correction was  
493 designed to avoid a scenario in which either the cold population or the warm population had  
494 important expression changes in one or more highly expressed genes that caused the relative  
495 expression of all other genes to shift, even if their absolute expression level did not.

496  
497 We used  $P_{ST}$  statistics to quantify gene expression divergence between cold and warm populations in  
498 each population pair:

499

$$P_{ST} = \frac{V_{between}}{V_{between} + 2V_{within}}$$

500 where  $V_{between}$  is between-populations variance for expression abundance,  $V_{within}$  is the average variance  
501 for expression abundance within populations. Although both within- and between-population  
502 components of variance can be confounded by the environmental variance,  $P_{ST}$  is still a useful statistic  
503 to quantify phenotypic differentiation (Merila 1997; Brommer 2011; Leinonen et al. 2013). Here,  
504 environmental variance should be reduced by the common laboratory environment. To reduce  
505 sampling variance before calculating  $P_{ST}$ , for each gene, we required the total mapped reads across all  
506 48 within-population samples to exceed 200 for a given developmental stage. Then for each  
507 population/stage, we excluded the crosses/samples with the highest and lowest gene expression for  
508 each gene (to avoid high  $P_{ST}$  values being driven by single anomalous values), resulting in six samples  
509 per population/stage. The  $P_{ST}$  quantile based on data excluding extreme samples is concordant with  
510 the  $P_{ST}$  quantile calculated using all the crosses for most cases (Fig. S3).

511  
512 We chose the above  $P_{ST}$ -based approach instead of simply testing for differential expression in part  
513 because our within-population samples reflect real variation as opposed to technical replicates. Also,  
514 many alternative methods make assumptions about the data (e.g., negative binomial distribution for  
515 transcript counts) which are difficult to apply to splicing, even if they hold for expression.  $P_{ST}$  and the  
516 population genetic index  $F_{ST}$  are under the same theoretical framework, and are often directly  
517 compared to search for evidence of adaptive trait differentiation. However, environmental and  
518 measurement variance will downwardly bias  $P_{ST}$ , making targets of local adaptation less likely to  
519 reach a threshold defined by genome-wide high  $F_{ST}$  outliers. Hence, in this study we simply focus on  
520 the highest quantiles of  $P_{ST}$  for a given trait/population comparison, as detailed below.

521  
522 As with gene expression, we used  $P_{ST}$  to estimate the intron usage differentiation between cold and  
523 warm populations, with  $V_{between}$  as the between-populations variance for a given intron's usage  
524 frequency,  $V_{within}$  as the average within populations variance for intron usage frequency. Before  
525 calculating the  $P_{ST}$ , for each exon-exon junction, we summed the intron excision events ( $n_i$ ) and the  
526 alternative events ( $n_j$ ) of the cluster across all samples in a developmental stage. The minimum for  
527 both types of event had to be at least 5 ( $n \in [n_i, n_j] \geq 5$ ) for the exon-exon junction to be included in  
528 subsequent analysis. Then for each exon-exon junction, we excluded the sample with highest and  
529 lowest intron usage in a population/stage and calculated  $P_{ST}$ .

530

531 *Examining co-directional change for outliers shared between population pairs*

532 For gene expression differentiation, we used the upper 5% quantile of  $P_{ST}$  as outlier cutoff to identify  
533 candidate genes potentially under geographically differential selection. To study the degree of parallel  
534 evolution in gene expression, we identified outlier genes shared between two population pairs and  
535 showing consistent changes in the cold populations relative to the warm ones (co-directional).  
536 Whether the number of shared outliers with co-directional change was significantly greater than  
537 expected by chance from the total shared genes between population pairs was determined by a one-  
538 tailed binomial test. The statistics here and those below assume the expression changes are  
539 independent among genes/introns, which is not always the case (genes can interact with each other  
540 via regulatory networks).

541  
542 The second approach used to examine parallelism of gene expression evolution was to focus on the  
543 outlier genes for a specific population pair (*outlier pair*) and examine whether the expression changes in  
544 other pair (*directional pair*) follow the same directions. If cold adaptation causes similar evolution in  
545 gene expression, those genes in the *directional pair* should have changes in the same directions as the  
546 *outlier pair*. Each of the pairwise population combinations had two comparisons; a population pair was  
547 assigned as the *outlier pair* in one comparison and as the *directional pair* in the other comparison. To  
548 generate a control set of genes for the null expectation of co-directional change proportion, we  
549 identified genes in the bottom 50% quantile for  $P_{ST}$  in both the *outlier pair* and the responding  
550 *directional pair*. We tested whether the proportion of co-directional change is higher in the outliers than  
551 that in the control using the Chi-squared Test.

552  
553 To identify exon usage outliers, a cutoff of the upper 5%  $P_{ST}$  is used. If multiple exon junctions had  
554  $P_{ST}$  pass the top 5% cutoff, only the exon junction with the highest  $P_{ST}$  would be kept as an outlier to  
555 control for nonindependence. Because the numbers of shared exon usage outliers in both population  
556 pairs are small (<10), we only performed the second type of analysis studying the proportion of co-  
557 directional changes between *outlier pair* and *directional pair* for the top 5% exon usage events. We  
558 identified exon usage events in the bottom 50%  $P_{ST}$  in both population pairs as control.

559  
560 *GO enrichment test for  $P_{ST}$  outlier genes*

561 The Gene Ontology enrichment tests were performed using the R package “clusterProfiler” (Yu et al.  
562 2012) based on the fly genome annotation (Carlson 2018). The types of GO terms being tests  
563 contained all three sub-Ontologies: Biological Process (BP), Cellular Component (CC) and Molecular  
564 Function (MF). Selection of overrepresented GO terms was based on adjusted p-value < 0.1 using

565 “BH” method (Benjamini and Hochberg 1995) for each sub-Ontology. For gene expression, the  
566 upper 5%  $P_{ST}$  outliers for each population pair were tested for GO enrichment. To determinate  
567 whether the shared significant GO terms between pairs were more than expected by chance, we  
568 randomly sampled the same numbers of genes as the outliers and performed the GO test for both  
569 pairs and identified the shared significant GO terms between pairs. We repeated the process 1000  
570 times to get a set of numbers for the shared significant GO terms and compared to the actual number  
571 of shared significant GO terms to get a permuted p-value.

572  
573 To access the functional categories of the differential intron usage, we calculate the quantile of  $P_{ST}$  for  
574 each exon usage. To rank the differentiation for a gene, we used the highest quantile (the most  
575 extreme differentiation) among the exon usages within the gene as the gene quantile ( $q_{gene}$ ). To  
576 account for the multiple testing of the exon usages for a gene, the adjusted total numbers of testing is  
577 calculated as  $n_{sum} = \sum_{i=1}^{i=j} (n_i - 1)$ , where  $n_i$  is the number of testing for a cluster and  $j$  is the number  
578 of clusters for the gene. Then adjust gene quantile is  $q'_{gene} = 1 - (1 - q_{gene}) \times n_{sum}$ . The upper 5%  $q'_{gene}$  was  
579 used to identify the most differentiated genes for intron usage and they were tested for GO  
580 enrichment as described above.

581  
582 *Cis- and trans-effects of regulatory divergence*

583 To study the contributions of cis- and trans-regulatory effects on expression and exon usage  
584 divergent, we focused our analysis on the upper 5%  $P_{ST}$  outliers for gene expression/exon usage. For  
585 each gene/exon junction in each population pair, we selected a representative cross showing the  
586 greatest difference between parental strains for this analysis. In addition, this difference needed to be  
587 larger than the average difference between the cold and warm populations for its pair.

588  
589 To study allele-specific expression/exon junction, we obtained the genomic sequences of the two  
590 parental strains aligned separately to the FlyBase *D. melanogaster* 5.77 assembly (Lack et al. 2015;  
591 2016). The SNP calling from the reference genome was done by samtools (Li et al. 2009). To avoid  
592 mapping bias for the RNAseq reads (Degner et al. 2009; Stevenson et al. 2013), we updated the  
593 reference based on the SNPs for the two parental stains by masking the SNPs as “N”. The F1 female  
594 adult RNA-seq reads were mapped to the updated reference using STAR with options: --chimFilter  
595 None --outFilterMultimapNmax 1 (Dobin et al. 2013). Because of the high level of heterozygosity  
596 within our inbred lines (Lack et al. 2015), we used a parental ancestry proportion statistic ( $f$ ) to study

597 the allele-specific expression instead of focusing on fixed difference between parental strains. The  
598 parental proportion in gene expression level/exon usage in the F1 RNA-seq sample was estimated as

599 
$$f = (p_{F1} - p_w) / (p_c - p_w)$$

600 where  $p_{F1}$  is the allele frequency in the RNA reads for the F1 sample,  $p_c$  and  $p_w$  are the allele frequency  
601 in the genomic reads for the cold- and warm-adapted parental lines respectively. SNPs were filtered  
602 with read counts  $\geq 10$  in the F1 RNA-seq sample and the parental samples as well as parental  
603 frequency difference  $|p_c - p_w| \geq 0.25$ . The parental proportion for each candidate gene was the  
604 average  $f$  for all sites located in the gene ( $\bar{f}$ ).

605  
606 We tested two null hypotheses corresponding to cis only and trans only regulatory differences. Under  
607 the null hypothesis that cis-regulatory effects are absent, the  $\bar{f}$  is expected to be near 0.5 because the  
608 cold parental strain contributes half of the alleles to F1 offspring, and alleles from different parents  
609 express similarly in these F1s (Cowles et al. 2002; McManus 2010; Meiklejohn et al. 2014). Under the  
610 null hypothesis that trans-regulatory effects are absent,  $\bar{f}$  is expected to approximate the ratio of the  
611 cold parental strain expression to the total expression of both parental strains (Wittkopp et al. 2004):  
612  $r_{F0} = E_c / (E_c + E_w)$ . However, sampling effects can cause  $\bar{f}$  to deviate from the null expectations.

613  
614 We accounted for different types of uncertainty on estimating  $f$ . The first is the uncertainty on  
615 estimating parental strain frequencies  $p_c$  and  $p_w$  from the genomic data. For each SNP used in the  
616 calculation, we resampled 60 alleles based on the estimated allele frequency, representing the 30  
617 individuals used for genome sequencing (Lack et al. 2015). Then we sampled reads by drawing with  
618 replacement among the resampled 60 alleles until we reached the observed read depth of the site to  
619 calculate the  $p_c'$  and  $p_w'$ . To account for the measurement uncertainty in F1 expression, we sampled  
620 with replacement for the F1 reads mapped to each gene (based on  $p_c'$  and  $p_w'$ ) until we reached the  
621 numbers of reads mapped to the gene. Then we recalculated the  $p_{F1}'$  for each SNPs and together with  
622  $p_c'$  and  $p_w'$  to calculate the  $\bar{f}'$  for each gene. We repeated the above process 1000 times to get a  
623 distribution of  $\bar{f}'$ . A 95% confidence interval of the distribution not overlapping with 0.5 suggested  
624 the existence of a cis-effect.

625  
626 However, there is another type of sampling effect if the regulatory variants are not fixed different  
627 between parental strains. For example, one strain may be heterozygous for a causative regulatory  
628 variant, which might be located outside the exons and hence absent from the RNAseq data. The null

629 hypothesis for inferring a cis-effect is that only trans-effects are present and the  $\bar{f}$  is 0.5. Sampling of  
630 trans-regulatory polymorphism does not affect the null expectation since trans-effect influences both  
631 target alleles similarly. However, the sampling of cis-regulatory polymorphism affects the null  
632 expectation for trans-effect because the F1 expression proportion  $\bar{f}$  can deviate from the parental  
633 expression ratio  $r_{F0}$ , potentially causing false positive inferences of trans-effect. Although there is no  
634 information about the frequency and effect size for the cis-regulatory mutations, we chose simple  
635 assumptions about them to make a relatively conservative approach for inferring trans-effects. We  
636 assumed that the frequency of the cis-regulatory allele is 0.5 in the cold-adapted strain (heterozygous,  
637  $Aa$ ) and 0 in the warm adapted strain (homozygous,  $aa$ ). This simplest polymorphism condition  
638 maximized the sampling effect within the cold strain. Then we assigned the effect size for the  $a$  cis-  
639 regulatory allele as the expression level of the warm adapted strain ( $E_w$ ). The effect size for the  $A$  cis-  
640 regulatory allele is  $2E_c - E_w$ , where the  $E_c$  is the expression level of the cold adapted strain. Then we  
641 sampled 30 alleles randomly from  $Aa$  with replacement to create diploid individuals and calculated  
642 the average expression for the sampled individuals from the cold strain  $E_c'$ . The updated  $r_{F0}'$  is  
643 calculated as  $E_c' / (E_c' + E_w)$ . The sampling and calculation were repeated 1000 times. Each time the  
644  $r_{F0}'$  is paired with a  $\bar{f}'$  described above to calculate the difference  $D' = \bar{f}' - r_{F0}'$ . A 95% confidence  
645 interval of  $D'$  not overlapping with 0 suggested the existence of a trans-effect.

646  
647 Based on the tests above, the set of candidate genes were classified into categories (McManus 2010;  
648 Schaefer et al. 2013; Chen et al. 2015) including no significant cis- or trans-effect, cis only, and trans  
649 only. For genes showing both cis- and trans-effects, we further classified them based on whether these  
650 two effects favored expression of the same (co-directional) or different parental allele (anti-  
651 directional). For exon usage differentiation, we applied a similar approach to classified the  
652 differentiated exons into the five categories, accounting for different sampling effects and  
653 measurement errors. Instead of analyzing expression level of the parental strains ( $E$ ), we analyzed  
654 their exon usage frequency for the sets of outlier exon junctions.

655  
656 For the  $P_{ST}$  outlier introns identified as cis only or both cis- and trans-effect, we hypothesized that  
657 causative cis-regulatory elements may show elevated allele frequency differentiation between the  
658 warm and cold populations. For expression abundance, the majority of cis-regulatory SNPs are  
659 located within 2kb upstream of the transcription start site and downstream of the transcription end  
660 site (Massouras et al. 2012). Therefore, we used the interval from 2kb upstream to 2kb downstream as



661 the focal region of a gene for this analysis. We calculated window  $F_{ST}$  and SNP  $F_{ST}$  using sequenced  
662 genomes from *Drosophila* Genome Nexus (Lack et al. 2015 & 2016). For window  $F_{ST}$ , the division of  
663 windows within a gene region is based on 250 non-singleton variable sites per window in the ZI  
664 population (Pool et al. 2017). The highest  $F_{ST}$  for the windows overlapping the focal region was  
665 assigned as its  $F_{ST\_winmax}$ . To determinate the statistical significance of  $F_{ST\_winmax}$ , we calculated  $F_{ST\_winmax}$   
666 for all other blocks of the same number of windows along the same chromosome arm where cross-  
667 over rates were above 0.5cM/Mb (Comeron et al. 2012), but excluding those within 10 windows of  
668 the focal region. The specific non-low recombination regions are: 2.3–21.4 Mb for the X  
669 chromosome, 0.5–17.5 Mb for arm 2L, 5.2–20.8 Mb for arm 2R, 0.6–17.7 Mb for arm 3L, and 6.9–  
670 26.6 Mb for arm 3R. SNP  $F_{ST}$  was calculated for all sites within the focal region and the highest value  
671 ( $F_{ST\_SNPmax}$ ) was thus obtained for the focal gene. Analogous to our  $F_{ST\_winmax}$  permutation, we also  
672 calculated  $F_{ST\_SNPmax}$  for permuted regions with the same number of SNPs as the focal region, along  
673 the non-low cross-over rate region on the same chromosome arm. For both  $F_{ST\_winmax}$  and  $F_{ST\_SNPmax}$ ,  
674 we then focused on regions in the upper 10% quantile of permuted values for further analysis. We  
675 tested whether the proportion of genes with high  $F_{ST}$  is higher in the cis-effect genes than that in  
676 control non-outliers using the Fisher's Exact Test because of the low counts.

677  
678 We also identified genes with significant cis-effects shared in two population pairs and examined  
679 whether the effects favored expression of the same cold or warm parental alleles (consistent cis-effect).  
680 Also, we tested whether the shared cis-effect genes also show elevated population genetic  
681 differentiation in the two pairs. We obtained “Population Branch Excess” statistic ( $PBE$ ) specific for  
682 cold populations for SNPs from Pool et al. 2017. We used  $\pm 2$ kb around the gene regions to look for  
683 any shared cis-effect genes containing SNPs with high  $PBE$  statistic for cold population in both pairs  
684 ( $PBE$  quantile  $< 0.05$  in both pairs).

685  
686 For exon usage, because the cis-regulation is largely contributed by the splice sites (Kurmangaliyev et  
687 al. 2015), we calculated the  $F_{ST}$  value for the splice sites, which are located within  $\pm 15$  base pair  
688 around the two intron/exon boundaries. The maximum  $F_{ST}$  among the splice sites for each intron is  
689 chosen as the SNP  $F_{ST}$  for the focal intron. We compared the  $F_{ST\_SNPmax}$  of the cis outlier introns and  
690 the non-outlier introns to see whether the cis outlier introns showed elevated  $F_{ST}$  based on Wilcoxon  
691 signed-rank test. To examine the potential function of splicing differentiation, genes containing high

692 SNP  $F_{ST}$  (upper 15% quantile of  $F_{ST\_SNPmax}$ ) flanking cis-regulated introns were identified as candidate  
693 genes.

694

### 695 **Acknowledgements**

696 We thank Colin Dewey for helpful discussions and the UW-Madison Center for High Throughput  
697 Computing (CHTC) for cluster usage. This work was funded by NSF DEB grant 1754745 to JEP  
698 and by NIH NIGMS grant F32GM106594 to JBL.

699

### 700 **Reference**

701 Adrion JR, Hahn MW, Cooper BS. 2015. Revisiting classic clines in *Drosophila melanogaster* in the  
702 age of genomics. *Trends Genet* 8:434–444.

703 Akhouayri I, Turc C, Royet J, Charroux B. 2011. Toll-8/Tollo negatively regulates antimicrobial  
704 response in the *Drosophila* respiratory epithelium. *PLoS Pathog* 7:e1002319.

705 Albert FW, Bloom JS, Siegel J, Day L, Kruglyak L. 2017. Genetics of trans-regulatory variation in  
706 gene expression. *eLife* 100:371–44.

707 Arthaud L, Ben Rokia-Mille S, Raad H, Dombrovsky A, Prevost N, et al. 2011. Trade-off between  
708 toxicity and signal detection orchestrated by frequency- and density-dependent genes. *PLoS One*  
709 6: e19805.

710 Bader DM, Wilkening S, Lin SG, Tekkedil MM, Dietrich K, et al. 2015. Negative feedback buffers  
711 effects of regulatory variants. *Mol Syst Biol* 11:785.

712 Ballard SL, Miller DL, Ganetzky B. 2014. Retrograde neurotrophin signaling through Tollo regulates  
713 synaptic growth in *Drosophila*. *J Cell Biol* 204:1157–1172.

714 Barbosa-Morais NL, Irimia M, Pan Q, Xiong HY, Gueroussov S, Lee LJ, et al. 2012. The  
715 evolutionary landscape of alternative splicing in vertebrate species. *Science* 338:1587–93.

716 Bastide H, Yassin A, Johanning EJ, Pool JE. 2014. Pigmentation in *Drosophila melanogaster*  
717 reaches its maximum in Ethiopia and correlates most strongly with ultra-violet radiation in sub-  
718 Saharan Africa. *BMC Evol Biol* 14:222–14.

719 Benjamini Y, Hochberg Y. 1995. Controlling the false discovery rate—a practical and powerful  
720 approach to multiple testing. *J Royal Stat Soc B* 57:289–300.

721 Bergland AO, Tobler R, González J, Schmidt P, Petrov D. 2016. Secondary contact and local  
722 adaptation contribute to genome-wide patterns of clinal variation in *Drosophila melanogaster*.  
723 *Mol Ecol* 25:1157–1174.

724 Božičević V, Hutter S, Stephan W, Wollstein A. 2016. Population genetic evidence for cold  
725 adaptation in European *Drosophila melanogaster* populations. *Mol Ecol* 25:1175–1191.

726 Brommer JE. 2011. Whither  $P_{ST}$ ? The approximation of  $Q_{ST}$  by  $P_{ST}$  in evolutionary and conservation  
727 biology. *J Evol Biol* 24:1160–1168.

- 728 Brown JB, Boley N, Eisman R, May GE, Stoiber MH, Duff MO, et al. 2014. Diversity and dynamics  
729 of the *Drosophila* transcriptome. *Nature*. 7515:393–9.
- 730 Catalan A, Hutter S, Parsch J. 2012. Population and sex differences in *Drosophila melanogaster*  
731 brain gene expression. *BMC Genomics* 13:1–12.
- 732 Chakraborty M, VanKuren NW, Zhao R, Zhang X, Kalsow S, Emerson JJ. 2017. Hidden genetic  
733 variation shapes the structure of functional elements in *Drosophila*. *Nat Genet* 50:20–25.
- 734 Chen J, Nolte V, Schlötterer C. 2015. Temperature Stress Mediates Decanalization and Dominance  
735 of Gene Expression in *Drosophila melanogaster*. *PLoS Genet* 11:e1004883.
- 736 Comeron JM, Ratnappan R, Bailin S. 2012. The many landscapes of recombination in *Drosophila*  
737 *melanogaster*. *PLoS Genet* 8:e1002905.
- 738 Conte GL, Arnegard ME, Peichel CL, Schluter D. 2012. The probability of genetic parallelism and  
739 convergence in natural populations. *Proc Royal Soc B* 279:5039–5047.
- 740 Coolon JD, McManus CJ, Stevenson KR, Graveley BR, Wittkopp PJ. 2014. Tempo and mode of  
741 regulatory evolution in *Drosophila*. *Genome Res* 24:797–808.
- 742 Cowles CR, Hirschhorn JN, Altshuler D, Lander ES. 2002. Detection of regulatory variation in  
743 mouse genes. *Nat Genet* 32:432–437
- 744 Degner JF, Marioni JC, Pai AA, Pickrell JK, Nkadori E, Gilad Y, Pritchard JK. 2009. Effect of read-  
745 mapping biases on detecting allele-specific expression from RNA-sequencing data.  
746 *Bioinformatics* 25:3207–3212.
- 747 Denby CM, Im JH, Yu RC, Pesce CG, Brem RB. 2012. Negative feedback confers mutational  
748 robustness in yeast transcription factor regulation. *Proc Natl Acad Sci USA* 109:3874–3878.
- 749 Deshpande G, Calhoun G& Schedl P. 2005. *Drosophila* Argonaute-2 is required early in  
750 embryogenesis for the assembly of centric/centromeric heterochromatin, nuclear division,  
751 nuclear migration, and germ-cell formation. *Gene Dev* 19:1680–1685.
- 752 Dobin A, Davis CA, Schlesinger F, Drenkow J, Zaleski C, Jha S, Batut P, Chaisson M, Gingeras TR.  
753 2013. STAR: ultrafast universal RNA-seq aligner. *Bioinformatics* 29:15–21.
- 754 Duneau D, Sun H, Revah J, San Miguel K, Kunerth HD, Caldas IV, Messer PW, Scott JG, Buchon  
755 N. 2018. Signatures of insecticide selection in the genome of *Drosophila melanogaster*. *G3*  
756 (Bethesda) 8:3469–3480.
- 757 Emerson JJ. 2019. Inferring compensatory evolution of cis- and trans-regulatory variation. *Trends*  
758 *Genet* 35:1–3.
- 759 Fabian DK, Kapun M, Nolte V, Kofler R, Schmidt PS, Schlötterer C, Flatt T. 2012. Genome-wide  
760 patterns of latitudinal differentiation among populations of *Drosophila melanogaster* from North  
761 America. *Mol Ecol* 21:4748–4769.
- 762 Fear JM, Leon-Novelo LG, Morse AM, Gerken AR, Van Lehmann K, Tower J, Nuzhdin SV,

- 763 McIntyre LM. 2016. Buffering of genetic regulatory networks in *Drosophila melanogaster*.  
764 Genetics 203:1177–1190.
- 765 Francis VA, Zorzano A, Teleman AA. 2010. dDOR is an EcR coactivator that forms a feed-forward  
766 loop connecting insulin and ecdysone signaling. Curr Biol 20:1799–1808.
- 767 Fraser HB. 2019. Improving estimates of compensatory cis–trans regulatory divergence. Trends  
768 Genet 35:3–5.
- 769 Gamazon ER, Stranger BE. 2014. Genomics of alternative splicing: evolution, development and  
770 pathophysiology Hum Genet 133:679–687
- 771 Gibilisco L, Zhou Q, Mahajan S, Bachtrog D. 2016. Alternative splicing within and between  
772 *Drosophila* species, sexes, tissues, and developmental stages. PLoS Genet 12: e1006464.
- 773 Gilad Y, Rifkin SA, Pritchard JK. 2008. Revealing the architecture of gene regulation: the promise of  
774 eQTL studies. Trends Genet 24:408–415.
- 775 Green L, Battlay P, Fournier-Level A, Good RT, Robin C. 2019. Cis- and trans-acting variants  
776 contribute to survivorship in a naïve *Drosophila melanogaster* population exposed to ryanoid  
777 insecticides. Proc Natl Acad Sci USA 116:10424–10429.
- 778 Hanson D, Hu J, Hendry AP, Barrett RDH. 2017. Heritable gene expression differences between lake  
779 and stream stickleback include both parallel and antiparallel components. Heredity 119:339–348.
- 780 Hart JC, Ellis NA, Eisen MB, Miller CT. 2018. Convergent evolution of 1493 gene expression in  
781 two high-toothed stickleback populations. PLoS Genetics 6:e1007443.
- 782 Hoekstra HE, Coyne JA. 2007. The locus of evolution: evo devo and the genetics of adaptation.  
783 Evolution 615: 995–1016.
- 784 Hoffmann AA, Hallas RJ, Dean JA, Schiffer M. 2003. Low potential for climatic stress adaptation in  
785 a rainforest *Drosophila* species. Science 301:100–102.
- 786 Hoffmann AA, Weeks AR. 2007. Climatic selection on genes and traits after a 100 year-old invasion:  
787 a critical look at the temper-ate-tropical clines in *Drosophila melanogaster* from eastern  
788 Australia. Genetica 129:133–147.
- 789 Huylmans AK, Parsch J. 2014. Population- and sex-biased gene expression in the excretion organs of  
790 *Drosophila melanogaster*. G3 (Bethesda). 4:2307–15.
- 791 Johnson KG, Tenney AP, Ghose A, Duckworth AM, Higashi ME, Parfitt K, Marcu O, Heslip TR,  
792 Marsh JL, Schwarz TL, et al. 2006. The HSPGs Syndecan and Dallylike bind the receptor  
793 phosphatase LAR and exert distinct effects on synaptic development. Neuron 49:517–531.
- 794 Jones FC, Grabherr MG, Chan YF, Russell P, Mauceli E, Johnson J, Swofford R, Pirun M, Zody  
795 MC, White S, et al. 2012. The genomic basis of adaptive evolution in threespine sticklebacks.  
796 Nature 484:55–61.
- 797 Juneja P, Quinn A, Jiggins FM. 2016. Latitudinal clines in gene expression and cis-regulatory

- 798 element variation in *Drosophila melanogaster*. *BMC Genomics*:1–11.
- 799 Kang J, Kim J, Choi K-W. 2011. Novel cytochrome P450, *cyp6a17*, is required for temperature  
800 preference behavior in *Drosophila*. *PLoS ONE* 6:e29800.
- 801 Kitano J, Ishikawa A, Kusakabe M. 2018. Parallel transcriptome evolution in stream threespine  
802 sticklebacks. *Devel Growth Differ* 61:104–113.
- 803 Kolaczkowski B, Kern AD, Holloway AK, Begun DJ. 2011. Genomic differentiation between  
804 temperate and tropical Australian populations of *Drosophila melanogaster*. *Genetics* 187:245–  
805 260.
- 806 Kurmangaliyev YZ, Favorov AV, Osman NM, Lehmann K-V, Campo D, Salomon MP, et al. 2015.  
807 Natural variation of gene models in *Drosophila melanogaster*. *BMC Genomics* 16:198
- 808 Lack JB, Lange JD, Tang AD, Corbett-Detig RB, Pool JE. 2016. A thousand fly genomes: An  
809 expanded *Drosophila* genome nexus. *Mol Biol Evol* 33:3308–3313.
- 810 Lack JB, Monette MJ, Johanning EJ, Sprengelmeyer QD, Pool JE. 2016. Decanalization of wing  
811 development accompanied the evolution of large wings in high-altitude *Drosophila*. *Proc Natl*  
812 *Acad Sci USA* 113:1014–1019.
- 813 Lai Z, Kane NC, Zou Y, Rieseberg LH. 2008. Natural variation in gene expression between wild and  
814 weedy populations of *Helianthus annuus*. *Genetics* 179:1881–1890.
- 815 Landry CR, Lemos B, Rifkin SA, Dickinson WJ, Hartl DL. 2007. Genetic properties influencing the  
816 evolvability of gene expression. *Science* 317:118–121.
- 817 Lange JD, Pool JE. 2016. A haplotype method detects diverse scenarios of local adaptation from  
818 genomic sequence variation. *Mol Ecol* 25:3081–3100.
- 819 Leder EH, McCairns RJS, Leinonen T, et al. 2015. The evolution and adaptive potential of  
820 transcriptional variation in sticklebacks—signatures of selection and widespread heritability.  
821 *Mol Biol and Evol* 32:674–689.
- 822 Leinonen T, McCairns RJS, O'Hara RB, Merilä J. 2013.  $Q_{ST}$ – $F_{ST}$  comparisons: evolutionary and  
823 ecological insights from genomic heterogeneity. *Nat Rev Genet.* 14:179–190.
- 824 Lemmon ZH, Bukowski R, Sun Q, Doebley JF. 2014. The role of cis regulatory evolution in maize  
825 domestication. *PLoS Genet* 10:e1004745–15.
- 826 Li B, Dewey Colin N. 2011. RSEM: accurate transcript quantification from RNA-Seq data with or  
827 without a reference genome. *BMC Bioinform* 12:323
- 828 Li H, Handsaker B, Wysoker A, Fennell T, Ruan J, et al. 2009. The Sequence alignment/map (SAM)  
829 format and SAMtools. *Bioinformatics* 25:2078–2079.
- 830 Li YI, Knowles DA, Humphrey J, Barbeira AN, Dickinson SP, Im HK, Pritchard JK. 2017.  
831 Annotation-free quantification of RNA splicing using LeafCutter. *Nat Genet* 50:151–158.

- 832 Losos JB. 2011. Convergence, adaptation, and constraint. *Evolution* 65:1827–1840.  
833
- 834 Machado HE, Bergland AO, O'Brien KR, Behrman EL, Schmidt PS, Petrov DA. 2016. Comparative  
835 population genomics of latitudinal variation in *Drosophila simulans* and *Drosophila*  
836 *melanogaster*. *Mol Ecol* 25:723–740.
- 837 Mack KL, Campbell P, Nachman MW. 2016. Gene regulation and speciation in house mice. *Genome*  
838 *Res* 26:451–461.
- 839 Massouras A, Waszak SM, Albarca-Aguilera M, Hens K, Holcombe W, Ayroles JF, Dermitzakis ET,  
840 Stone EA, Jensen JD, Mackay TFC, et al. 2012. Genomic Variation and Its Impact on Gene  
841 Expression in *Drosophila melanogaster*. *PLoS Genet* 8:e1003055.
- 842 Mateo L, Ullastres A, González J. 2014. A transposable element insertion confers xenobiotic  
843 resistance in *Drosophila*. *PLoS Genet* 10:e1004560.
- 844 McGirr JA, Martin CH. 2018. Parallel evolution of gene expression between trophic specialists  
845 despite divergent genotypes and morphologies. *Evol Lett* 2:62–75.
- 846 McManus CJ, Coolon JD, Duff MO, Eipper-Mains J, Graveley BR, Wittkopp PJ. 2010. Regulatory  
847 divergence in *Drosophila* revealed by mRNA-seq. *Genome Res* 20:816–825.
- 848 McManus CJ, Coolon JD, Eipper-Mains J, Wittkopp PJ, Graveley BR. 2014. Evolution of splicing  
849 regulatory networks in *Drosophila*. *Genome Res* 24:786–796.
- 850 McMillan EA, Longo SM, Smith MD, Broskin S, Lin B, Singh NK, Strohlic TI. 2018. The protein  
851 kinase CK2 substrate Jabba modulates lipid metabolism during *Drosophila* oogenesis. *J Biol*  
852 *Chem* 293:2990–3002.
- 853 Meiklejohn CD, Coolon JD, Hartl DL, Wittkopp PJ. 2014. The roles of cis- and trans-regulation in  
854 the evolution of regulatory incompatibilities and sexually dimorphic gene expression. *Genome*  
855 *Res* 24:84–95.
- 856 Merilä J. 1997. Quantitative trait and allozyme divergence in the greenfinch (*Carduelis chloris*,  
857 *Aves*: Fringillidae). *Biol J Linn Soc* 61:243–266.
- 858 Nakano Y, Fujitani K, Kurihara J, Ragan J, Usui-Aoki K, Shimoda L, Lukacsovich T, Suzuki K,  
859 Sezaki M, Sano Y, et al. 2001. Mutations in the novel membrane protein Spinster interfere with  
860 programmed cell death and cause neural degeneration in *Drosophila melanogaster*. *Mol Cell*  
861 *Biol* 21:3775–3788.
- 862 Nandamuri SP, Conte MA, Carleton KL. 2018. Multiple trans QTL and one cis-regulatory deletion  
863 are associated with the differential expression of cone opsins in African cichlids. *BMC*  
864 *Genomics*. 19:945.
- 865 Nayak A, Berry B, Tassetto M, Kunitomi M, Acevedo A, Deng C, Krutchinsky A, Gross J,  
866 Antoniewski C, Andino R. 2010. Cricket paralysis virus antagonizes Argonaute 2 to modulate  
867 antiviral defense in *Drosophila*. *Nat Struct Mol Biol*. 17:547–554.
- 868 Osada N, Miyagi R, Takahashi A. 2017. Cis- and trans-regulatory effects on gene expression in a

- 869 natural population of *Drosophila melanogaster*. *Genetics* 206:2139–2148.
- 870 Pitchers W, Pool JE, Dworkin I. 2012. Altitudinal clinal variation in wing size and shape in african  
871 *Drosophila melanogaster*: one cline or many? *Evolution* 67:438–452.
- 872 Pool JE, Braun DT, Lack JB. 2016. Parallel evolution of cold tolerance within *Drosophila*  
873 *melanogaster*. *Mol Biol Evol* 34:349–360.
- 874 Pool JE, Corbett-Detig RB, Sugino RP, Stevens KA, Cardeno CM, Crepeau MW, Duchen P,  
875 Emerson JJ, Saelao P, Begun DJ, et al. 2012. Population genomics of sub-Saharan *Drosophila*  
876 *melanogaster*: African diversity and non-African admixture. *PLoS Genet* 8:e1003080–24.
- 877 Pool JE. 2015. The Mosaic Ancestry of the *Drosophila* Genetic Reference Panel and the *D.*  
878 *melanogaster* reference genome reveals a network of epistatic fitness interactions. *Mol Biol Evol*  
879 32:3236–3251.
- 880 Reinhardt JA, Kolaczowski B, Jones CD, Begun DJ, Kern AD. 2014. Parallel geographic variation  
881 in *Drosophila melanogaster*. *Genetics* 197:361–373.
- 882 Rong et al. 2011. Spinster is required for autophagic lysosome reformation and mTOR reactivation  
883 following starvation. *Proc Natl Acad Sci USA* 108:7826–7831.
- 884 Rosenblum EB, Parent CE, Brandt EE. 2014. The molecular basis of phenotypic convergence. *Annu*  
885 *Rev Ecol Evol Syst* 45:203–226.
- 886 Sackton TB, et al. 2019. Convergent regulatory evolution and loss of flight in paleognathous birds.  
887 *Science* 364:74–78.
- 888 Schaefer B, Emerson JJ, Wang T-Y, Lu M-YJ, Hsieh L-C, Li W-H. 2013. Inheritance of gene  
889 expression level and selective constraints on trans- and cis-regulatory changes in yeast. *Mol Biol*  
890 *Evol* 30:2121–2133.
- 891 Schluter D. 2000. *The ecology of adaptive radiation*. Oxford Univ. Press, New York.
- 892 Schmidt PS, Paaby AB. 2008. Reproductive diapause and life-history clines in North American  
893 populations of *Drosophila melanogaster*. *Evolution* 62:1204–1215.
- 894 Seppo A. 2003. Induction of neuron-specific glycosylation by Tollo/Toll-8, a *Drosophila* Toll-like  
895 receptor expressed in non-neural cells. *Development* 130:1439–1448.
- 896 Signor S, Nuzhdin S. 2018. Dynamic changes in gene expression and alternative splicing mediate the  
897 response to acute alcohol exposure in *Drosophila melanogaster*. *Heredity* 121:342–360.
- 898 Singh P, Börger C, More H, Sturmbauer C. 2017. The role of alternative splicing and differential  
899 gene expression in cichlid adaptive radiation. *Genome Biol Evol* 9:2764–2781.
- 900 Smith CCR, Tittes S, Mendieta JP, Collier-Zans E, Rowe HC, Rieseberg LH, Kane NC. 2018.  
901 Genetics of alternative splicing evolution during sunflower domestication. *Proc Natl Acad Sci*  
902 *USA* 115:6768–6773.

- 903 Sprengelmeyer QD, Mansourian S, Lange JD, Matute DR, Cooper BS, Jirle EV, Stensmyr MC, Pool  
904 JE. 2018. Discovery of *Drosophila melanogaster* from Wild African Environments and Genomic  
905 Insights into Species History. *bioRxiv* 45:1153–13.
- 906 St Pierre SE, Ponting L, Stefancsik R, McQuilton P, the FlyBase Consortium. 2013. FlyBase 102—  
907 advanced approaches to interrogating FlyBase. *Nucleic Acids Res* 42:D780–D788.
- 908 Stern DL. 2013. The genetic causes of convergent evolution. *Nat Rev Genet* 14:751–764.
- 909 Stevenson KR, Coolon JD, Wittkopp PJ. 2013. Sources of bias in measures of allele-specific  
910 expression derived from RNA-seq data aligned to a single reference genome. *BMC Genomics*  
911 14:536.
- 912 Venables JP, Tazi J, Juge F. 2011. Regulated functional alternative splicing in *Drosophila*. *Nucleic*  
913 *Acids Res* 40:1–10.
- 914 Verta JP, Jones FC. 2019. Predominance of cis-regulatory changes in parallel expression divergence  
915 of sticklebacks. *eLife*. 8:e43785.
- 916 Wittkopp PJ, Kalay G. 2011. Cis-regulatory elements: molecular mechanisms and evolutionary  
917 processes underlying divergence. *Nat Rev Genet* 13:59–69.
- 918 Wittkopp PJ, Haerum BK, Clark AG. 2004. Evolutionary changes in cis and trans gene regulation.  
919 *Nature* 430:85–88.
- 920 Wittkopp PJ, Haerum BK, Clark AG. 2008. Regulatory changes underlying expression differences  
921 within and between *Drosophila* species. *Nat Genet* 40:346–350.
- 922 Yagi Y, Nishida Y, Ip YT. 2010. Functional analysis of Toll-related genes in *Drosophila*. *Dev*  
923 *Growth Differ* 52:771–783.
- 924 Yu G, Wang L, Han Y, He Q. 2012. clusterProfiler: an R package for comparing biological themes  
925 among gene clusters. *OMICS* 16:284–287.
- 926 Zhao L, Begun DJ. 2017. Genomics of parallel adaptation at two timescales in *Drosophila*. *PLoS*  
927 *Genet* 13:e1007016.
- 928 Zhao L, Wit J, Svetec N, Begun DJ. 2015. Parallel gene expression differences between low and high  
929 latitude populations of *Drosophila melanogaster* and *D. simulans*. *PLoS Genet* 11:e1005184.
- 930 Zhang J, Liu M, Su Y, Du J, Zhu AJ. 2012. A targeted in vivo RNAi screen reveals deubiquitinases  
931 as new regulators of Notch signaling. *G3 (Bethesda)* 2:1563–1575.
- 932
